# Supplementary material
Source: PubMed Central journal article supplement (PMC3277165)
Supplement: 1120587109_pnas.201120587SI.pdf [file 1120587109_pnas.201120587SI.pdf]

# Supporting Information

Nagy et al. 10.1073/pnas.1120587109

## SI Experimental Procedures

**RNA Isolation, cDNA Synthesis, and Real-Time Quantitative PCR.** Total cellular RNA was isolated using the RNeasy Plus Mini kit (Qiagen Nordic) or Agilent Total RNA Isolation Mini kit (Agilent Technologies) according to the instructions of the manufacturer. One microgram of total RNA was reverse-transcribed using SuperScript VILO cDNA Synthesis kit (Invitrogen), according to the instructions of the manufacturer. The relative level of the different transcripts were determined with the LC FastStart DNA Master SYBR Green I kit in a LightCycler instrument (Roche), using the standard curve method, according to the instructions of the manufacturer, with the primers listed in Table S1. Target genes were measured and normalized to the endogenous control GAPDH.

**Immunofluorescence Staining.** The cells were deposited on glass slides in a cytospin centrifuge and fixed in acetone:methanol (2:1). For single staining, following rehydration in balanced salt solution (BSS), the slides were incubated with primary antibody at room temperature for 60 min. For EBNA2, mouse mAb PE2 (IgG1; Leica Biosystem NovoCastra; dilution 1:50) and for LMP1, S-12 (IgG2a; culture supernatant; dilution 1:50) were used. Following washing in BSS, fluorochrome-labeled anti-mouse antibody was added, and the slides were incubated for 30 min at room temperature. EBNA2 was visualized with goat anti-mouse IgG1-Alexa Fluor 488 (Invitrogen; dilution 1:200), and LMP1 was detected with goat anti-mouse IgG2a-Alexa Fluor 594 (Invitrogen; dilution 1:200). The slides were mounted with Vectashield containing DAPI (Vector Laboratories).

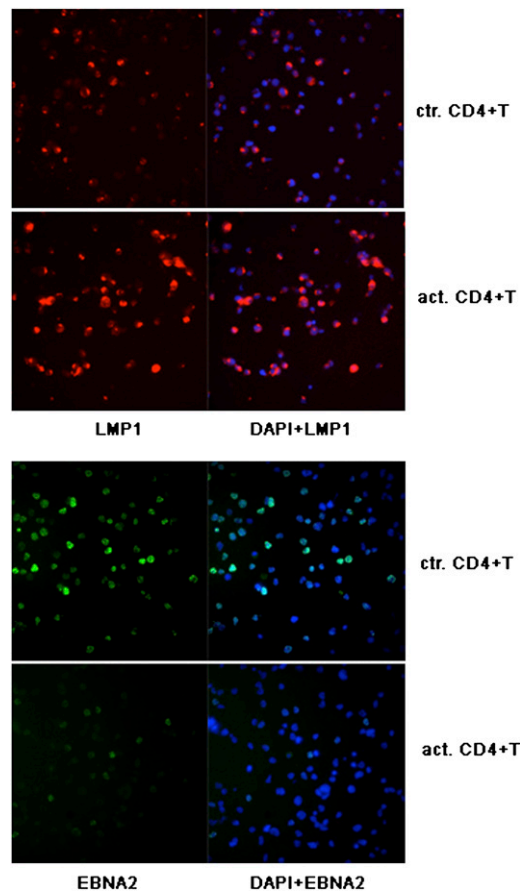

**Fig. S1.** Immunofluorescence staining of LCLs cultured in the TW system. LCLs were cultured in the insert with control or activated CD4 T cells for 5 d. Cells were stained for LMP1, using S12 mAb (*Upper*) and EBNA2, with PE2 mAb (*Lower*).
